# Supplementary material for: Nanoporous Amorphous Carbon with Exceptional Ultra-High Strength
Source: MDPI journal article supplement (doi:10.3390/nano13081429), 2023-04-21
Supplement: s1 [file s1]

# Supplementary Material

## Nanoporous amorphous carbon with exceptional ultra-high strength

Daniel Castillo-Castro, Felipe Correa, Emiliano Aparicio, Nicolas Amigo, Alejandro Prada, Rafael I. Gonzalez, Eduardo Bringa, and Felipe J. Valencia

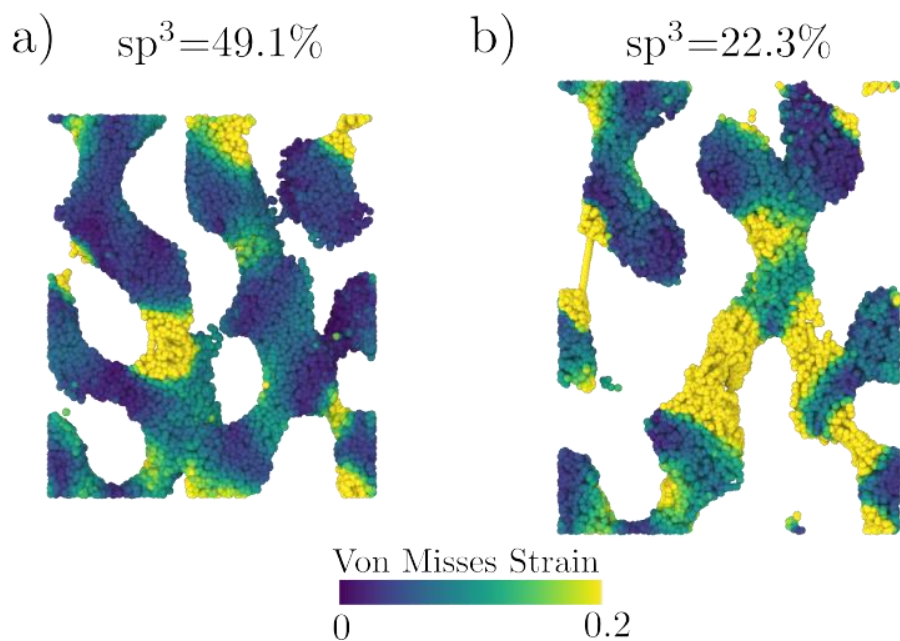

Figure S1. Von Mises strain for a nanoporous aC with  $sp^3$  of 49.1% (a) and 22.3% (b).  
In figure, a) represent a strain of 0.2, while b) a strain of 0.28.
